# Supplementary material for: Osteosarcoma cells exploit lung fibroblast-driven inflammatory microenvironment for metastasis formation
Source: Research Square preprint supplement (doi:10.21203/rs.3.rs-7037095/v1), 2025-07-15
Supplement: Supplementary file 1 [file 607fee8321e704b13144741e.docx]

**Supplementary Material for**

**Osteosarcoma cells exploit lung fibroblast-driven inflammatory microenvironment for metastasis formation**

Gabriela Sampaio-Ribeiro, Sara F. F. Almeida, Hugo R. S. Ferreira, Liliana Santos, Célia M. F. Gomes*

*Corresponding author: [cgomes@fmed.uc.pt](mailto:cgomes@fmed.uc.pt); University of Coimbra, Coimbra Institute for Clinical and Biomedical Research (iCBR) Faculty of Medicine, 3000-548 Coimbra, Portugal Phone: +351 239 480 072

**Supplementary Materials and Methods**

1. **Sequencing coverage and quality statistics of transcriptomic data**

Transcriptomic analysis was carried out using single-end sequencing, prepared with the TruSeq library prep kit and sequenced using the NovaSeq6000 SP Flowcell 100 cycles kit (Illumina, Inc.), targeting *Mus musculus* (Ensembl GRCm38.82). RNA sequencing was performed on the Illumina NovaSeq 6000 instrument at the VIB Nucleomics Core ([www.nucleomics.be](http://www.nucleomics.be)). The VIB Nucleomics Core also handled the reads pre-processing, which included quality trimming (FastX 0.0.14, HannonLab), adapter trimming (cutadapt 1.15) [1], quality filtering (FastX 0.0.14 and the ShortRead 1.40.0 package) [2] and contaminants removal (bowtie 2.3.3.1). Subsequently, the pre-processed reads were aligned to the Mus_musculus.Ensembl.GRCm.38.82 reference genome using STAR 2.5.2b [3] in combination with the SAMtools 1.5 Bioconductor package [4]. The expression levels of genes overlapped by reads were calculated using the EDASeq package [5], with normalization performed within and between samples. Differential gene expression analysis was conducted by fitting a negative binomial generalized linear model with the edgeR 3.24.3 package [6]. The resulting p-values were adjusted for multiple tests using the Benjamini-Hochberg method to control the false discovery rate (FDR).

**Supplementary Table 1 (S1) -** Sequencing Coverage and Quality Statistics of the transcriptomic data.

a The pre-processed reads were aligned to the reference genome of Mus_musculus.Ensembl.GRCm.38.82.

| **Sample ID** | **Total number of sequenced reads** | **Total number of uniquely mapped reads (%)a** | **RNA integrity number (RIN)** | **Ratio of all reads aligned to rRNA regions to total uniquely mapped reads (rRNA rate)** | **Ratio of exon-mapped reads to total uniquely mapped reads (Expression Profile Efficiency) (%)** | **Total number of detected transcripts with reads ≥1** |
| --- | --- | --- | --- | --- | --- | --- |
| CTR1@L002 | 19,883,627 | 19,651,437 (99.19) | 8,9 | 31 | 16130614 (89.03) | 22689 |
| CTR2@L002 | 16,621,714 | 16,437,329 (99.22) | 9,2 | 379 | 14167644 (93.98) | 11988 |
| CTR4@L002 | 26,287,493 | 25,999,562 (99.27) | 8,8 | 48 | 22109856 (91.74) | 22896 |
| CTR5@L002 | 25,314,103 | 24,994,807 (99.13) | 8,8 | 17 | 20436947 (89.34) | 26840 |
| MC1@L002 | 17,832,083 | 17,640,448 (99.27) | 7,1 | 32 | 14652466 (93.5) | 18694 |
| MC2@L002 | 22,657,407 | 22,422,060 (99.32) | 8,7 | 67 | 18621680 (92.03) | 22564 |
| MC3@L002 | 17,242,538 | 17,076,283 (99.35) | 8,5 | 173 | 14407684 (94.18) | 17165 |
| MC4@L002 | 21,512,944 | 21,263,604 (99.21) | 8,7 | 18 | 17493089 (89.72) | 24781 |
| MC5@L002 | 17,430,978 | 17,190,929 (99.01) | 8,5 | 83 | 13912651 (88.4) | 18977 |
| MC6@L002 | 16,361,215 | 16,149,937 (99.10) | 7,6 | 55 | 13078095 (90.12) | 17616 |
| TS1@L002 | 15,366,061 | 15,173,900 (99.14) | 8,9 | 196 | 12767431 (92.37) | 15152 |
| TS2@L002 | 17,617,589 | 17,396,855 (99.13) | 8,6 | 100 | 14430910 (90.42) | 18232 |
| TS3@L002 | 21,856,239 | 21,583,069 (99.11) | 8,5 | 26 | 17386086 (89.05) | 25131 |
| TS5@L002 | 16,383,516 | 16,174,622 (99.09) | 9,1 | 28 | 13176676 (89.55) | 17426 |
| TS6@L002 | 15,881,097 | 15,590,997 (98.54) | 8,8 | 100 | 12889655 (92.29) | 14338 |

**References**

1. Martin M. Cutadapt removes adapter sequences from high-throughput sequencing reads. EMBnet J. 2011;17:10. <https://doi.org/10.14806/ej.17.1.200>

2. Morgan M, Anders S, Lawrence M, Aboyoun P, Pagès H, Gentleman R. ShortRead: a bioconductor package for input, quality assessment and exploration of high-throughput sequence data. Bioinformatics. 2009;25:2607–8. <https://doi.org/10.1093/bioinformatics/btp450>

3. Dobin A, Davis CA, Schlesinger F, Drenkow J, Zaleski C, Jha S, et al. STAR: ultrafast universal RNA-seq aligner. Bioinformatics. 2013;29:15–21. <https://doi.org/10.1093/bioinformatics/bts635>

4. Li H, Handsaker B, Wysoker A, Fennell T, Ruan J, Homer N, et al. The Sequence Alignment/Map format and SAMtools. Bioinformatics. 2009;25:2078–9. <https://doi.org/10.1093/bioinformatics/btp352>

5. Risso D, Schwartz K, Sherlock G, Dudoit S. GC-Content Normalization for RNA-Seq Data. BMC Bioinformatics. 2011;12:480. <https://doi.org/10.1186/1471-2105-12-480>

6. Robinson MD, McCarthy DJ, Smyth GK. edgeR: a Bioconductor package for differential expression analysis of digital gene expression data. Bioinformatics. 2010;26:139–40. <https://doi.org/10.1093/bioinformatics/btp616>
